# Supplementary material
Source: PubMed Central journal article supplement (PMC2801262)
Supplement: supp_M109.049841_jbc.M109.049841-4.pdf [file supp_M109.049841_jbc.M109.049841-4.pdf]

A.

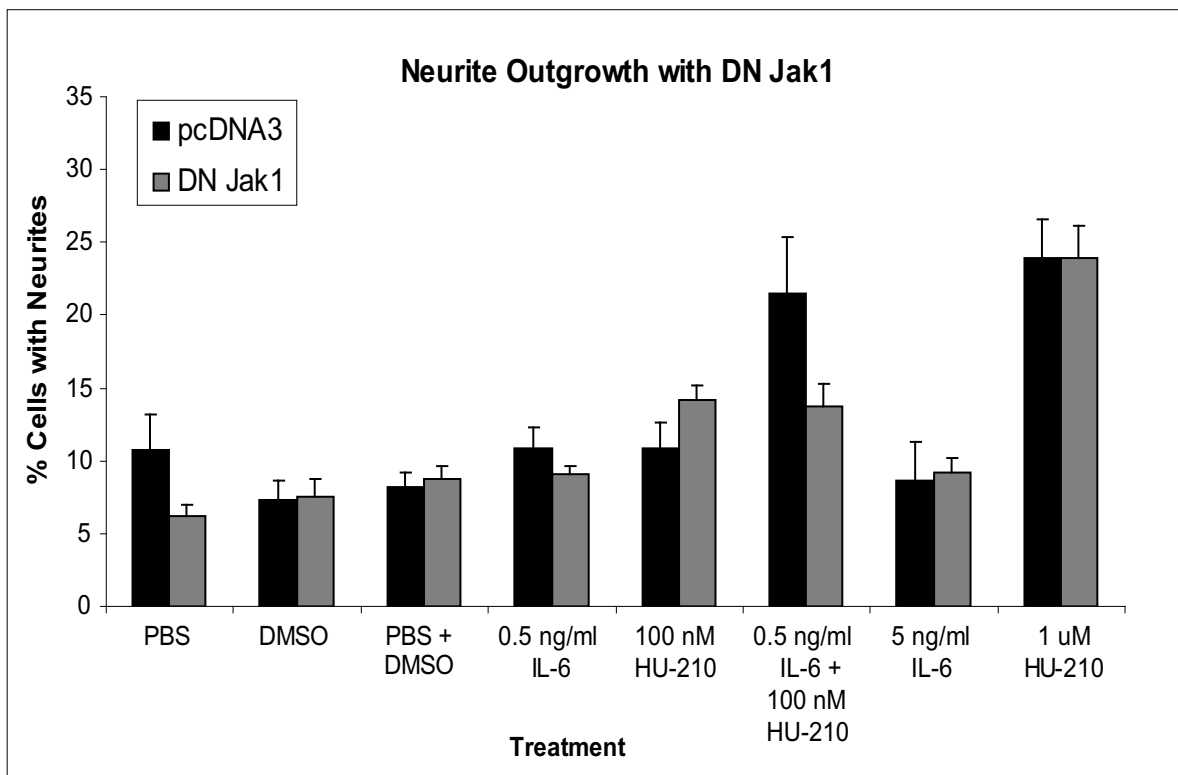

B.

|                                |                | Comparison                     |       | P value |  |
|--------------------------------|----------------|--------------------------------|-------|---------|--|
| pcDNA3                         | PBS            | 0.5 ng/ml IL-6                 | 0.487 | ns      |  |
|                                | PBS            | 5 ng/ml IL-6                   | 0.293 | ns      |  |
|                                | DMSO           | 100 nM HU-210                  | 0.084 | ns      |  |
|                                | DMSO           | 1 uM HU-210                    | 0.000 | ***     |  |
|                                | PBS + DMSO     | 0.5 ng/ml IL-6 + 100 nM HU-210 | 0.002 | **      |  |
|                                | 0.5 ng/ml IL-6 | 0.5 ng/ml IL-6 + 100 nM HU-210 | 0.007 | *       |  |
|                                | 100 nM HU-210  | 0.5 ng/ml IL-6 + 100 nM HU-210 | 0.009 | *       |  |
|                                | 1 uM HU-210    | 0.5 ng/ml IL-6 + 100 nM HU-210 | 0.201 | ns      |  |
| 100 nM HU-210                  | pcDNA3         | DN Jak1                        | 0.080 | ns      |  |
| 1 uM HU-210                    | pcDNA3         | DN Jak1                        | 0.496 | ns      |  |
| 0.5 ng/ml IL-6 + 100 nM HU-210 | pcDNA3         | DN Jak1                        | 0.021 | *       |  |

Figure 4S
