# Supplementary material
Source: PubMed Central journal article supplement (PMC2801262)
Supplement: supp_M109.049841_jbc.M109.049841-5.pdf [file supp_M109.049841_jbc.M109.049841-5.pdf]

A.

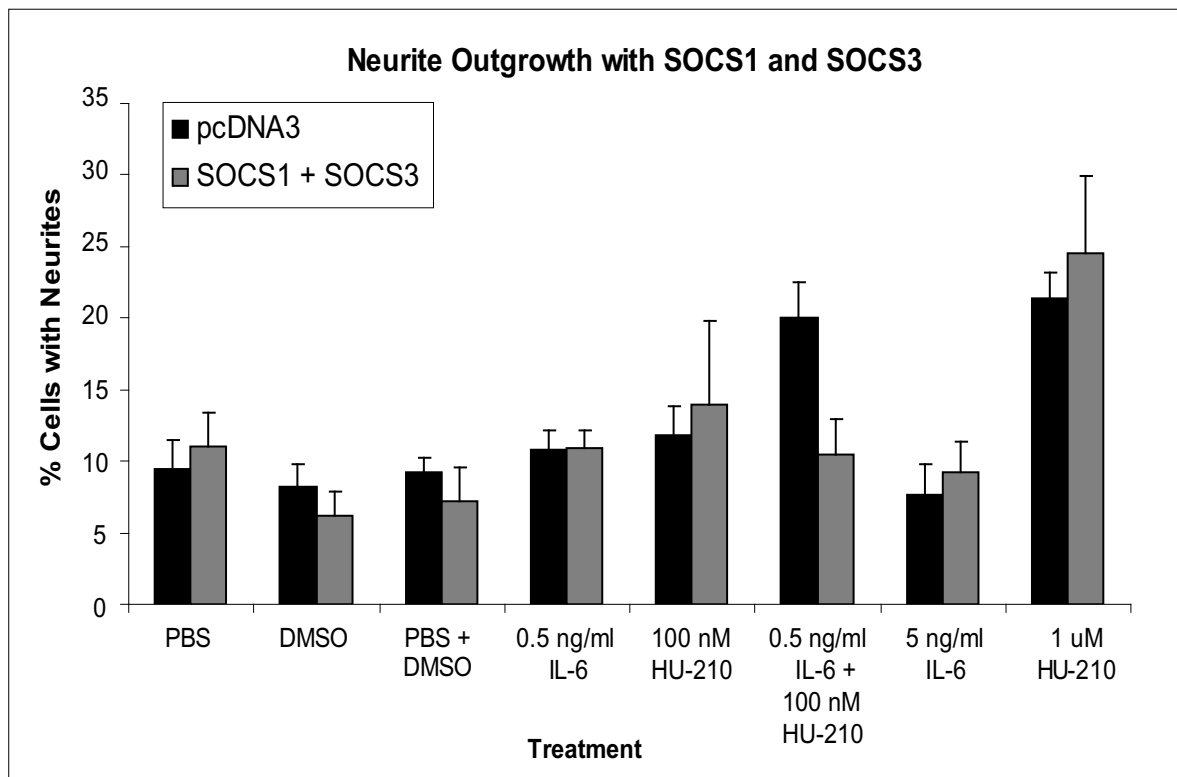

B.

|                                | Comparison     |                                | P value |    |
|--------------------------------|----------------|--------------------------------|---------|----|
|                                |                |                                |         |    |
| pcDNA3                         | PBS            | 0.5 ng/ml IL-6                 | 0.292   | ns |
|                                | PBS            | 5 ng/ml IL-6                   | 0.287   | ns |
|                                | DMSO           | 100 nM HU-210                  | 0.107   | ns |
|                                | DMSO           | 1 uM HU-210                    | 0.001   | ** |
|                                | PBS + DMSO     | 0.5 ng/ml IL-6 + 100 nM HU-210 | 0.003   | ** |
|                                | 0.5 ng/ml IL-6 | 0.5 ng/ml IL-6 + 100 nM HU-210 | 0.007   | *  |
|                                | 100 nM HU-210  | 0.5 ng/ml IL-6 + 100 nM HU-210 | 0.019   | *  |
|                                | 1 uM HU-210    | 0.5 ng/ml IL-6 + 100 nM HU-210 | 0.345   | ns |
| 100 nM HU-210                  | pcDNA3         | SOCS1 + SOCS3                  | 0.352   | ns |
| 1 uM HU-210                    | pcDNA3         | SOCS1 + SOCS3                  | 0.274   | ns |
| 0.5 ng/ml IL-6 + 100 nM HU-210 | pcDNA3         | SOCS1 + SOCS3                  | 0.021   | *  |

Figure 5S
