# Supplementary material
Source: PubMed Central journal article supplement (PMC2801262)
Supplement: supp_M109.049841_jbc.M109.049841-8.pdf [file supp_M109.049841_jbc.M109.049841-8.pdf]

A.

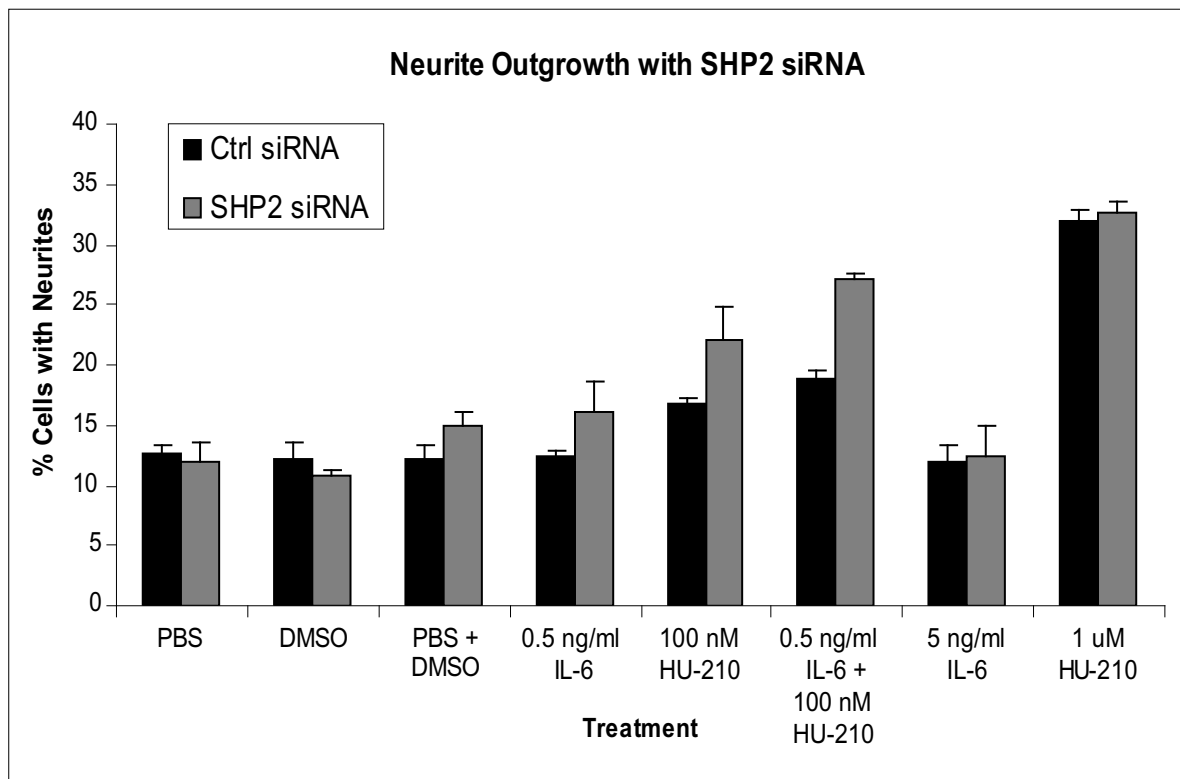

B.

|                                | Comparison     |                                | P value |     |
|--------------------------------|----------------|--------------------------------|---------|-----|
|                                |                |                                |         |     |
| Ctrl siRNA                     | PBS            | 0.5 ng/ml IL-6                 | 0.408   | ns  |
|                                | PBS            | 5 ng/ml IL-6                   | 0.353   | ns  |
|                                | DMSO           | 100 nM HU-210                  | 0.019   | *   |
|                                | DMSO           | 1 uM HU-210                    | 0.000   | *** |
|                                | PBS + DMSO     | 0.5 ng/ml IL-6 + 100 nM HU-210 | 0.005   | *   |
|                                | 0.5 ng/ml IL-6 | 0.5 ng/ml IL-6 + 100 nM HU-210 | 0.001   | **  |
|                                | 100 nM HU-210  | 0.5 ng/ml IL-6 + 100 nM HU-210 | 0.042   | *   |
|                                | 1 uM HU-210    | 0.5 ng/ml IL-6 + 100 nM HU-210 | 0.000   | *** |
| 100 nM HU-210                  | Ctrl siRNA     | SHP2 siRNA                     | 0.094   | ns  |
| 1 uM HU-210                    | Ctrl siRNA     | SHP2 siRNA                     | 0.329   | ns  |
| 0.5 ng/ml IL-6 + 100 nM HU-210 | Ctrl siRNA     | SHP2 siRNA                     | 0.000   | *** |

C.

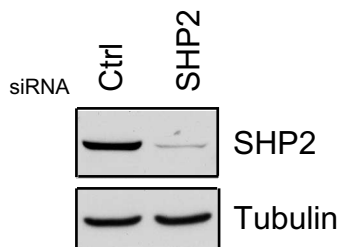

Figure 8S
