# Supplementary material
Source: PubMed Central journal article supplement (PMC2801262)
Supplement: supp_M109.049841_jbc.M109.049841-9.pdf [file supp_M109.049841_jbc.M109.049841-9.pdf]

A.

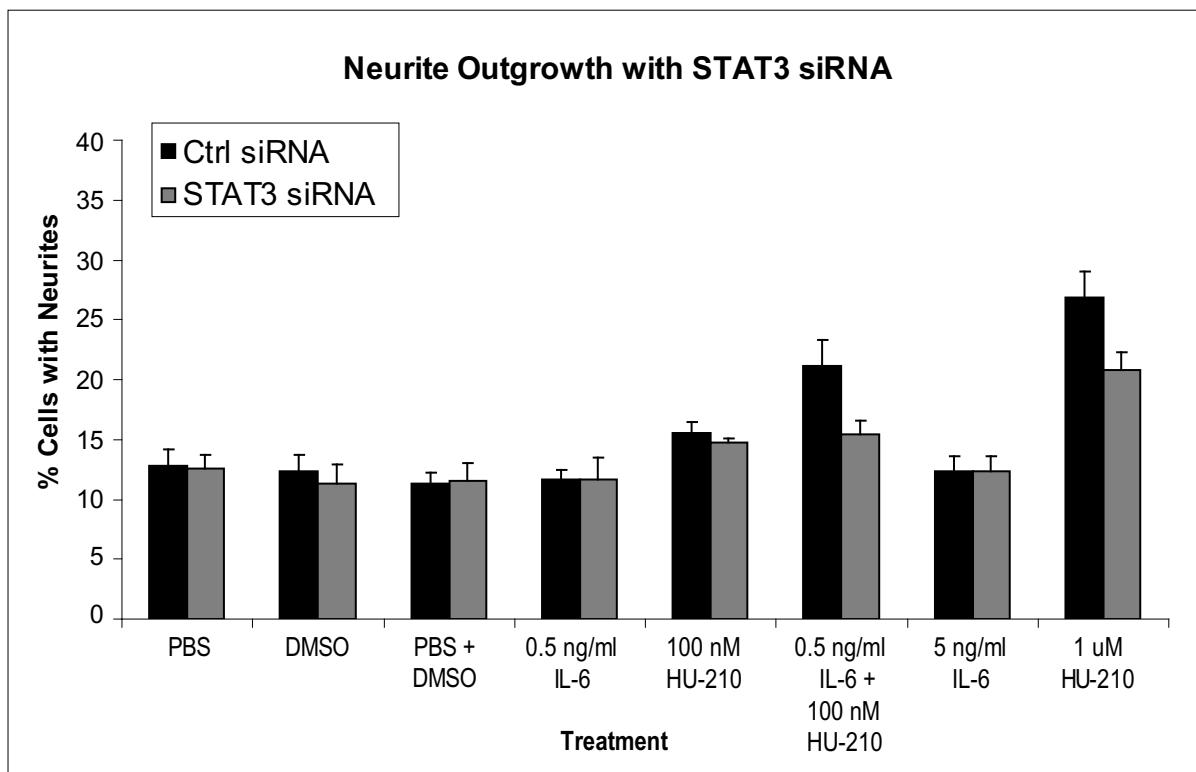

B.

|                                | Comparison |                                | P value        |       |
|--------------------------------|------------|--------------------------------|----------------|-------|
|                                | Ctrl siRNA | PBS                            | 0.5 ng/ml IL-6 | 0.238 |
| PBS                            |            | 5 ng/ml IL-6                   | 0.406          | ns    |
| DMSO                           |            | 100 nM HU-210                  | 0.051          | ns    |
| DMSO                           |            | 1 uM HU-210                    | 0.001          | **    |
| PBS + DMSO                     |            | 0.5 ng/ml IL-6 + 100 nM HU-210 | 0.003          | **    |
| 0.5 ng/ml IL-6                 |            | 0.5 ng/ml IL-6 + 100 nM HU-210 | 0.003          | **    |
| 100 nM HU-210                  |            | 0.5 ng/ml IL-6 + 100 nM HU-210 | 0.028          | *     |
| 1 uM HU-210                    |            | 0.5 ng/ml IL-6 + 100 nM HU-210 | 0.056          | ns    |
| 100 nM HU-210                  | Ctrl siRNA | STAT3 siRNA                    | 0.213          | ns    |
| 1 uM HU-210                    | Ctrl siRNA | STAT3 siRNA                    | 0.030          | *     |
| 0.5 ng/ml IL-6 + 100 nM HU-210 | Ctrl siRNA | STAT3 siRNA                    | 0.029          | *     |

C.

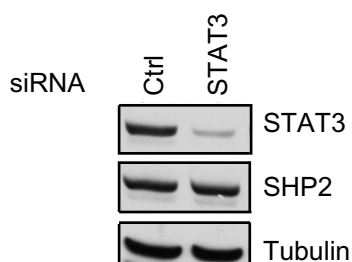

Figure 9S
