# Supplementary material
Source: PubMed Central journal article supplement (PMC2801262)
Supplement: supp_M109.049841_jbc.M109.049841-10.pdf [file supp_M109.049841_jbc.M109.049841-10.pdf]

A.

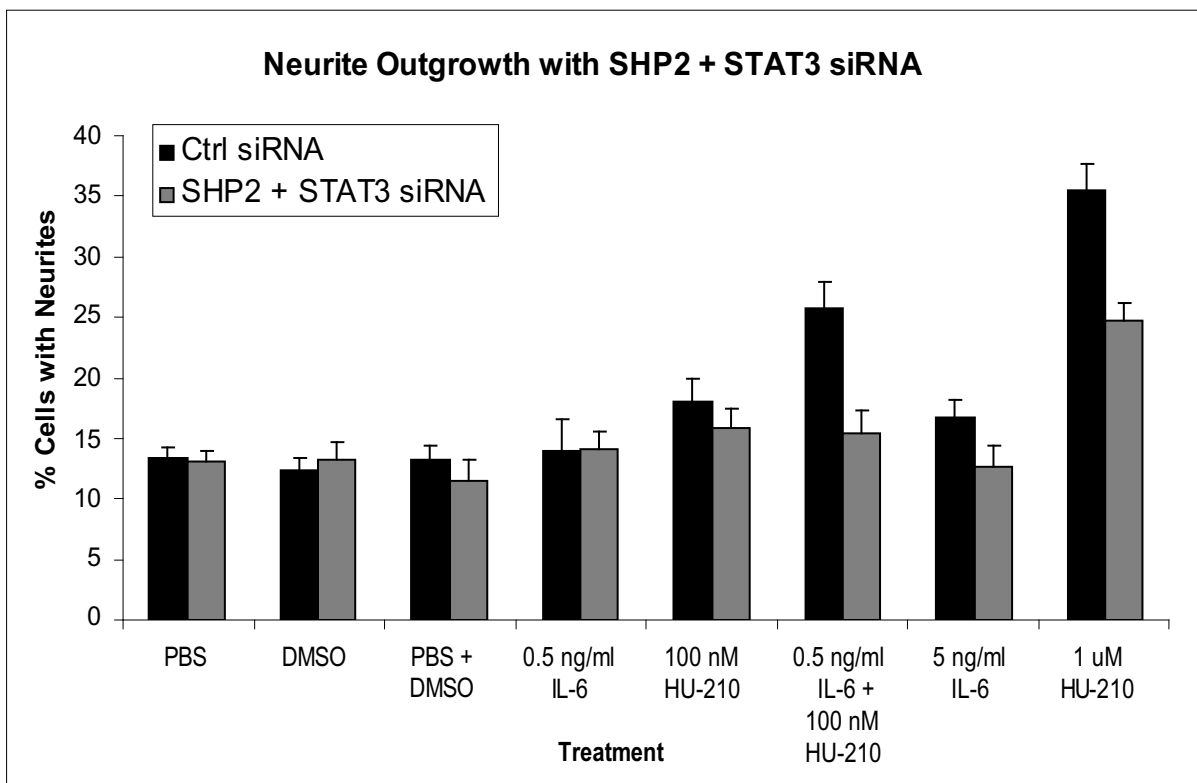

B.

|                                |                | Comparison                     | P value |     |
|--------------------------------|----------------|--------------------------------|---------|-----|
| Ctrl siRNA                     | PBS            | 0.5 ng/ml IL-6                 | 0.420   | ns  |
|                                | PBS            | 5 ng/ml IL-6                   | 0.046   | *   |
|                                | DMSO           | 100 nM HU-210                  | 0.022   | *   |
|                                | DMSO           | 1 uM HU-210                    | 0.000   | *** |
|                                | PBS + DMSO     | 0.5 ng/ml IL-6 + 100 nM HU-210 | 0.001   | **  |
|                                | 0.5 ng/ml IL-6 | 0.5 ng/ml IL-6 + 100 nM HU-210 | 0.006   | *   |
|                                | 100 nM HU-210  | 0.5 ng/ml IL-6 + 100 nM HU-210 | 0.018   | *   |
|                                | 1 uM HU-210    | 0.5 ng/ml IL-6 + 100 nM HU-210 | 0.010   | *   |
| 100 nM HU-210                  | Ctrl siRNA     | SHP2 + STAT3 siRNA             | 0.214   | ns  |
| 1 uM HU-210                    | Ctrl siRNA     | SHP2 + STAT3 siRNA             | 0.004   | **  |
| 0.5 ng/ml IL-6 + 100 nM HU-210 | Ctrl siRNA     | SHP2 + STAT3 siRNA             | 0.006   | *   |

C.

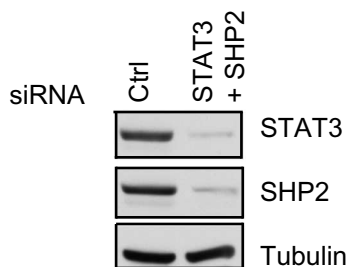

Figure 10S
