# Supplementary material
Source: PubMed Central journal article supplement (PMC2801262)
Supplement: supp_M109.049841_jbc.M109.049841-11.pdf [file supp_M109.049841_jbc.M109.049841-11.pdf]

A.

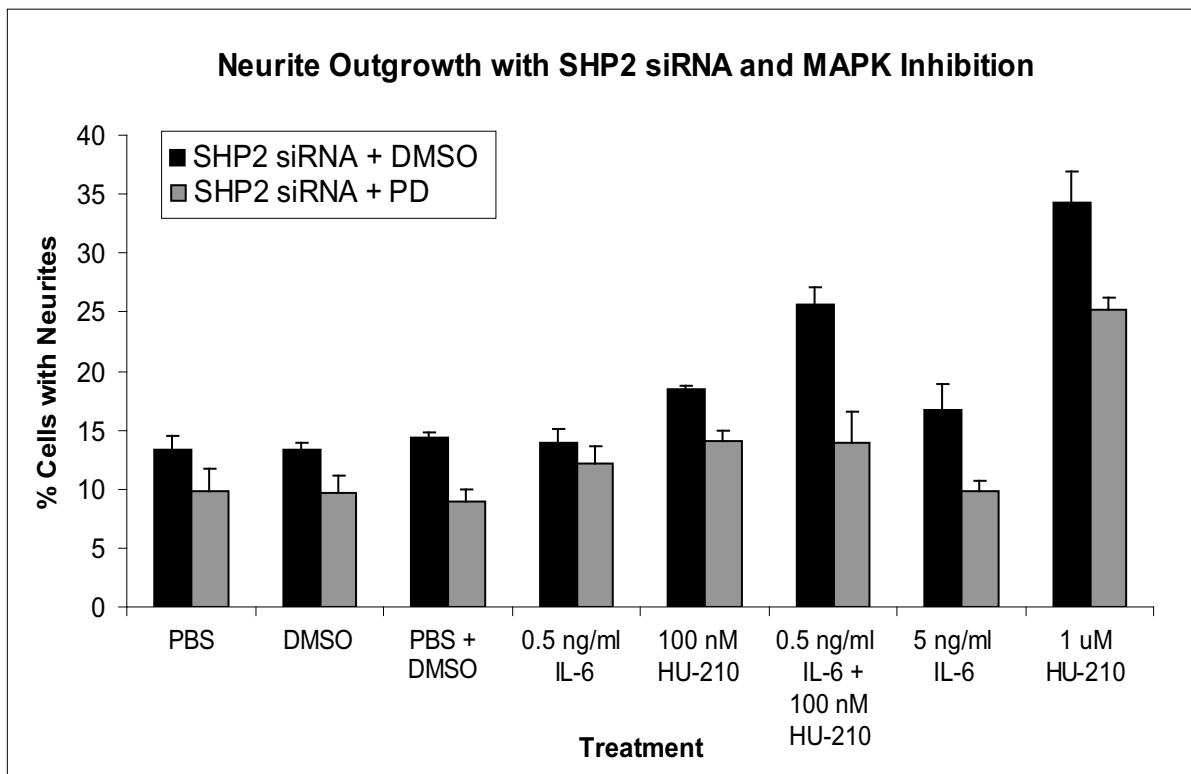

B.

|                                | Comparison     |                                | P value |    |
|--------------------------------|----------------|--------------------------------|---------|----|
| DMSO                           | PBS            | 0.5 ng/ml IL-6                 | 0.352   | ns |
|                                | PBS            | 5 ng/ml IL-6                   | 0.108   | ns |
|                                | DMSO           | 100 nM HU-210                  | 0.001   | ** |
|                                | DMSO           | 1 uM HU-210                    | 0.001   | ** |
|                                | PBS + DMSO     | 0.5 ng/ml IL-6 + 100 nM HU-210 | 0.005   | *  |
|                                | 0.5 ng/ml IL-6 | 0.5 ng/ml IL-6 + 100 nM HU-210 | 0.002   | ** |
|                                | 100 nM HU-210  | 0.5 ng/ml IL-6 + 100 nM HU-210 | 0.005   | ** |
|                                | 1 uM HU-210    | 0.5 ng/ml IL-6 + 100 nM HU-210 | 0.025   | *  |
| 100 nM HU-210                  | DMSO           | PD                             | 0.006   | *  |
| 1 uM HU-210                    | DMSO           | PD                             | 0.017   | *  |
| 0.5 ng/ml IL-6 + 100 nM HU-210 | DMSO           | PD                             | 0.008   | *  |

Figure 11S
