# Supplementary material
Source: PubMed Central journal article supplement (PMC2801262)
Supplement: supp_M109.049841_jbc.M109.049841-16.pdf [file supp_M109.049841_jbc.M109.049841-16.pdf]

## Supplemental Data

**Table 1S – Two-tail T-test analysis for Figure 2B**

| Comparison     |                                | P value |     |
|----------------|--------------------------------|---------|-----|
| PBS            | 0.05 ng/ml IL-6                | 0.367   | ns  |
| PBS            | 0.5 ng/ml IL-6                 | 0.319   | ns  |
| PBS            | 5 ng/ml IL-6                   | 0.462   | ns  |
| DMSO           | 10 nM HU-210                   | 0.528   | ns  |
| DMSO           | 100 nM HU-210                  | 0.054   | ns  |
| DMSO           | 1 uM HU-210                    | 0.000   | *** |
| 0.5 ng/ml IL-6 | 0.5 ng/ml IL-6 + 10 nM HU-210  | 0.145   | ns  |
| 0.5 ng/ml IL-6 | 0.5 ng/ml IL-6 + 100 nM HU-210 | 0.000   | *** |
| 0.5 ng/ml IL-6 | 0.5 ng/ml IL-6 + 1 uM HU-210   | 0.000   | *** |
| 1 uM HU-210    | 1 uM HU-210 + 0.05 ng/ml IL-6  | 0.089   | ns  |
| 1 uM HU-210    | 1 uM HU-210 + 0.5 ng/ml IL-6   | 0.000   | *** |
| 1 uM HU-210    | 1 uM HU-210 + 5 ng/ml IL-6     | 0.443   | ns  |
| 100 nM HU-210  | 0.5 ng/ml IL-6 + 100 nM HU-210 | 0.033   | *   |
| 1 uM HU-210    | 0.5 ng/ml IL-6 + 100 nM HU-210 | 0.109   | ns  |

ns, not significant; \*,  $P < 0.05$ ; \*\*,  $P < 0.005$ ; \*\*\*,  $P < 0.0005$

**Table 2S – Wilcoxon Mann-Whitney Test for cortical neurite length distributions**

| Comparison    |                              | P value |     |
|---------------|------------------------------|---------|-----|
| PBS           | 5 ng/ml IL-6                 | 0.479   | ns  |
| DMSO          | 100 nM HU-210                | 0.001   | **  |
| PBS + DMSO    | 5 ng/ml IL-6 + 100 nM HU-210 | 0.000   | *** |
| 5 ng/ml IL-6  | 5 ng/ml IL-6 + 100 nM HU-210 | 0.000   | *** |
| 100 nM HU-210 | 5 ng/ml IL-6 + 100 nM HU-210 | 0.018   | *   |

ns, not significant; \*,  $P < 0.05$ ; \*\*,  $P < 0.005$ ; \*\*\*,  $P < 0.0005$
