# Supplementary material
Source: PubMed Central journal article supplement (PMC2801262)

**A.**

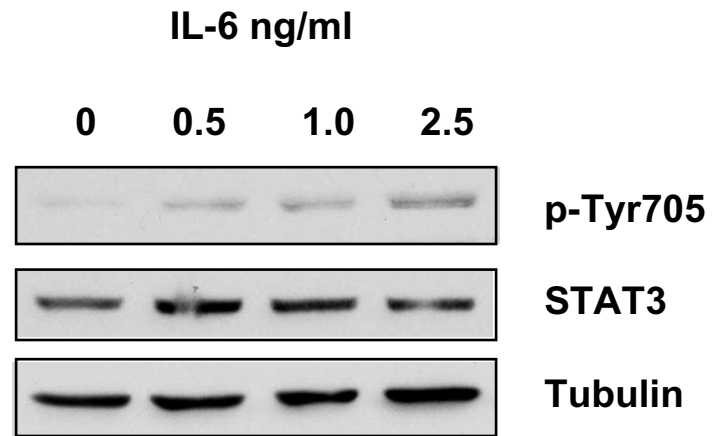

**B.**

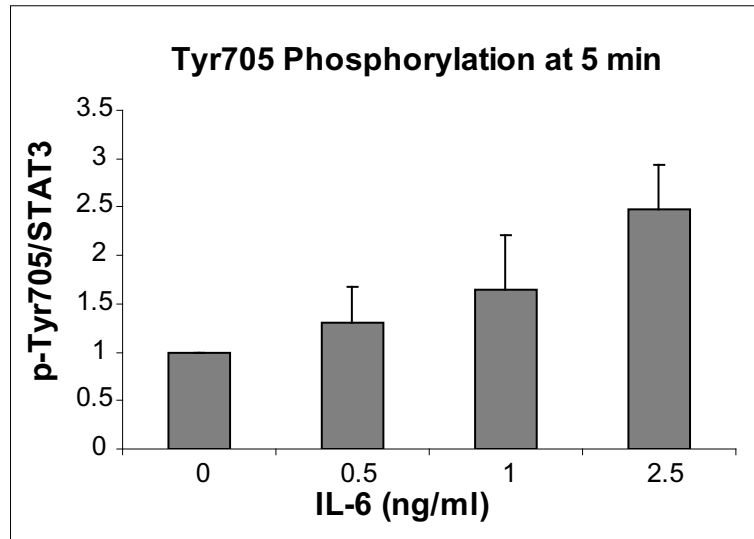

Figure 1S

Supplement: supp_M109.049841_jbc.M109.049841-1.pdf [file supp_M109.049841_jbc.M109.049841-1.pdf]

A.

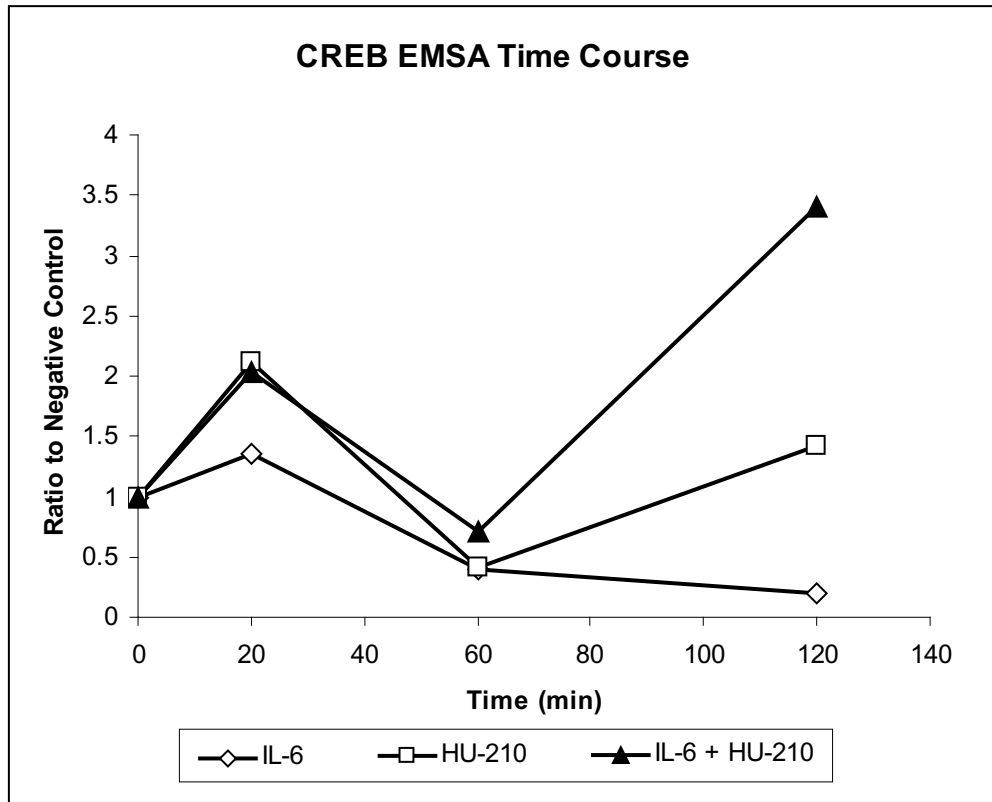

B.

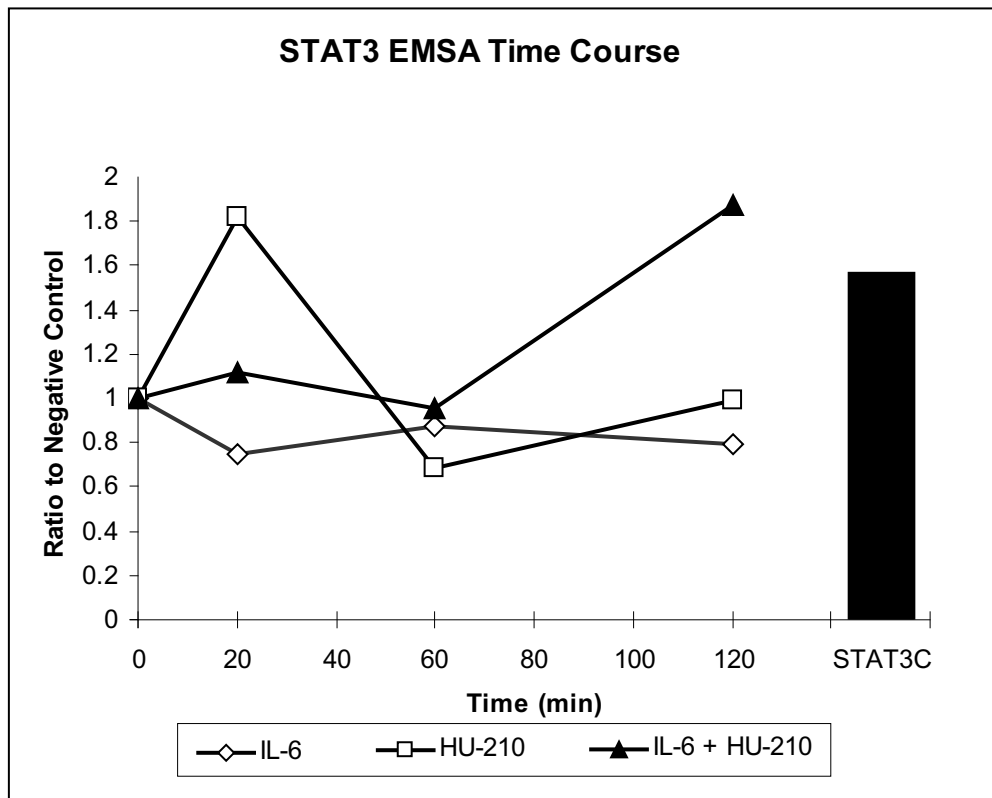

Figure 13S

Supplement: supp_M109.049841_jbc.M109.049841-13.pdf [file supp_M109.049841_jbc.M109.049841-13.pdf]

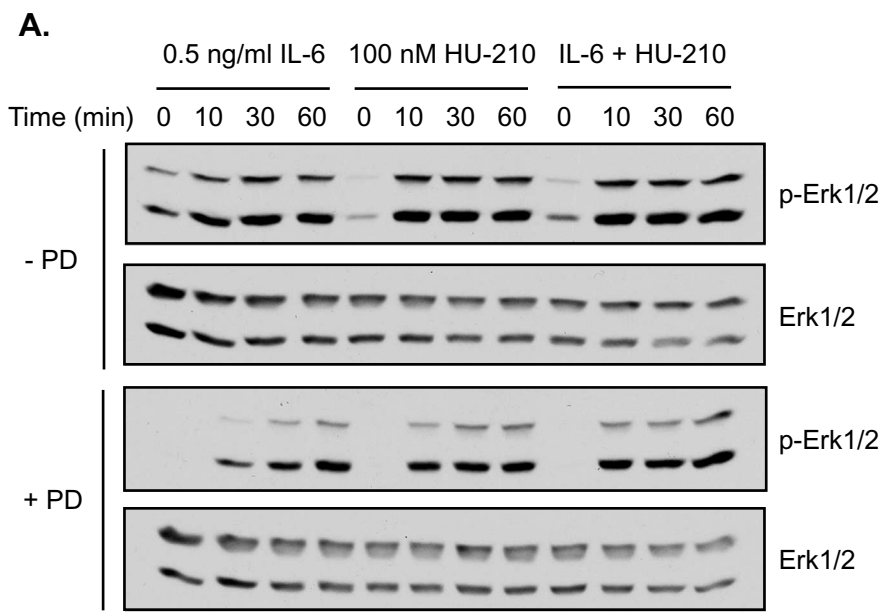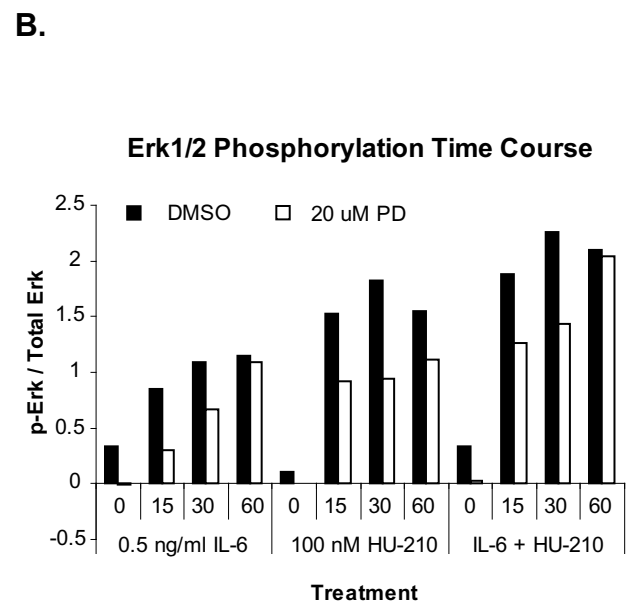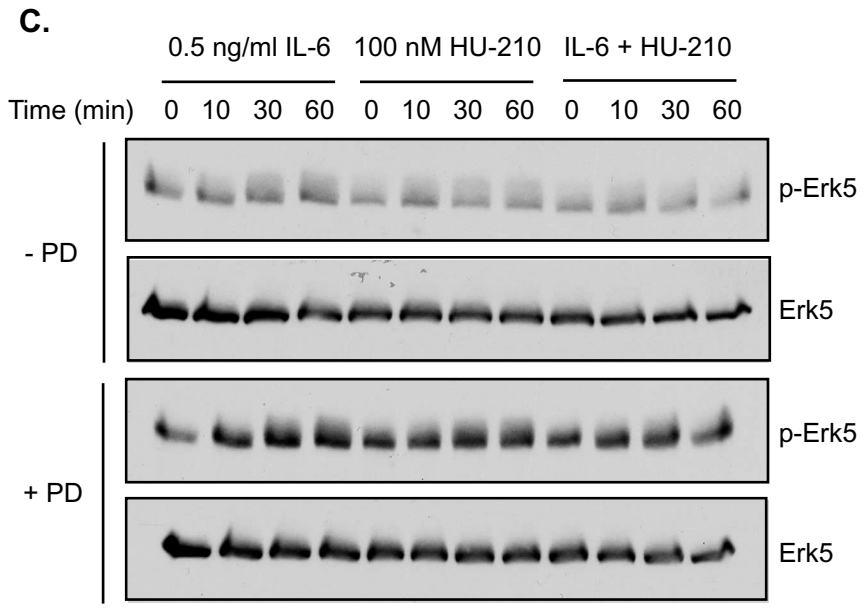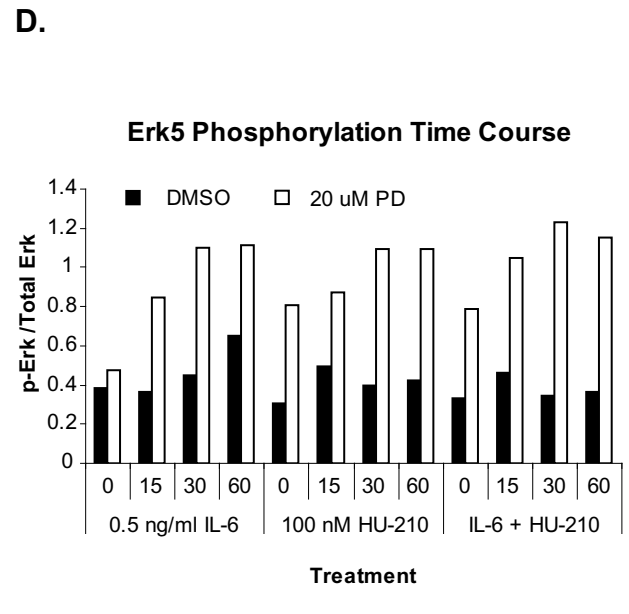

Figure 14S

Supplement: supp_M109.049841_jbc.M109.049841-14.pdf [file supp_M109.049841_jbc.M109.049841-14.pdf]
